# Supplementary material for: miR199a-5p inhibits hepatic insulin sensitivity via suppression of ATG14-mediated autophagy
Source: PubMed Central journal article supplement (PMC5851987; doi:10.1038/s41419-018-0439-7), 2018-03-14
Supplement: 41419_2018_439_MOESM1_ESM.pdf [file 41419_2018_439_MOESM1_ESM.pdf]

Figure S1.

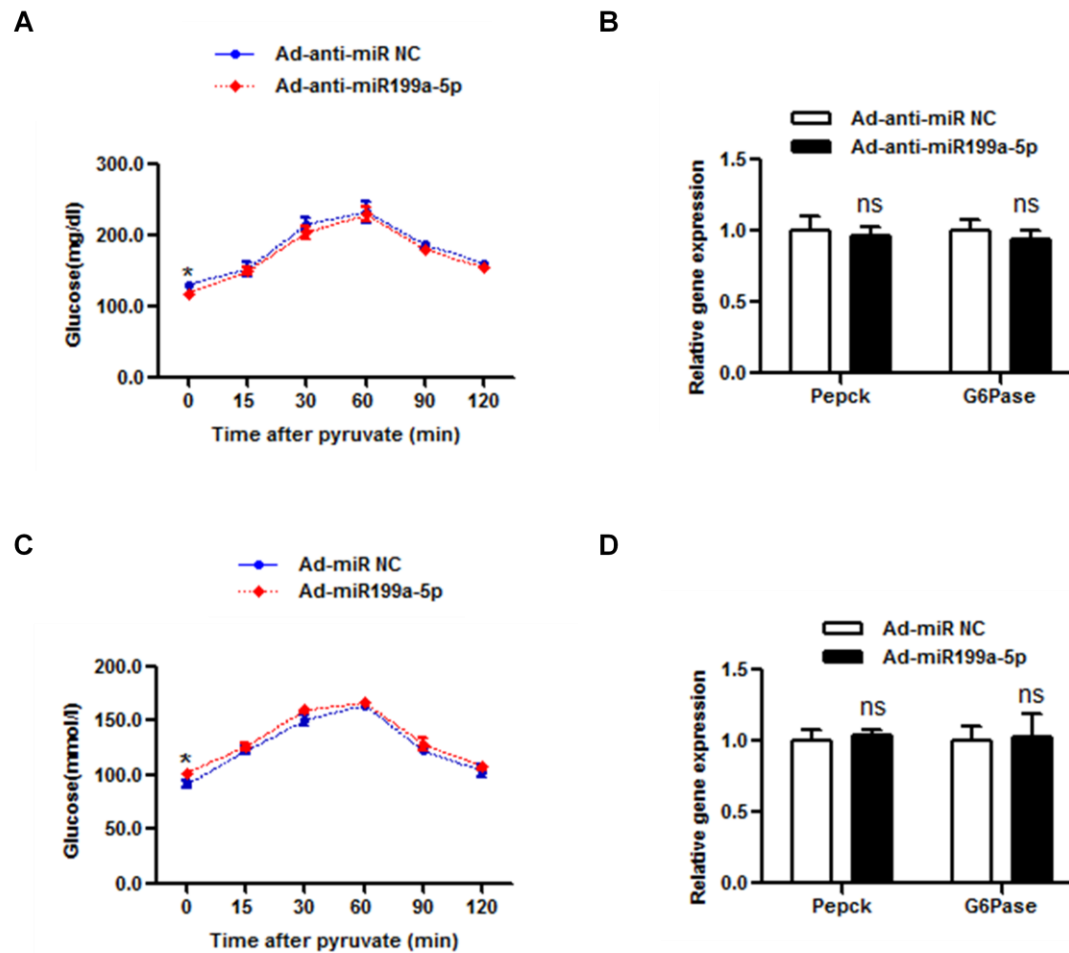

Figure legends.

Figure S1. Inhibition or overexpression of miR199a-5p has no effect on gluconeogenesis *in vivo*.

A-B: Male C57BL/6J WT mice were fed with high fat diet for 3 months, then infected with adenovirus-inhibiting miR199a-5p (Ad-anti-miR199a-5p) or negative control (Ad-anti-miR NC) via tail-vein injection. A. Performance of PTTs at day 7. B. mRNA expression levels of *PEPCK* and *G6Pase*. The two-tailed Student t test was applied to determine the difference between the Ad-anti-miR199a-5p group and the control group (\* $P < 0.05$ , ns, not statistically significant),

**n=8 per group.** C-D: Male C57BL/6J WT mice were infected with adenovirus-expressing miR199a-5p (Ad-miR199a-5p) or negative control (**Ad-miR NC**) via tail-vein injection. C. Performance of PTTs at day 7. D. mRNA expression levels of *Pepck* and *G6Pase*. The two-tailed Student t test was applied to determine the difference between the Ad-anti-miR199a-5p group and the control group (\*P < 0.05, ns, not statistically significant), **n=6 per group.**

### Supplementary Table 1.

Primers used for real-time quantitative PCR.

| Genes           | Forword primer(5' -> 3') | Reverse primer(5' -> 3') |
|-----------------|--------------------------|--------------------------|
| Atg14           | CACTGCACACACTCAGGAAC     | ATCTCCACTCGCGTCTGATT     |
| Cav1            | GCTCTGCCCGGGTGTGGAAA     | AACGGTGTAGAGATGTCCCTGCG  |
| Hif1 $\alpha$   | GATGACGGCGACATGGTTTAC    | CTCACTGGGCCATTTCTGTGT    |
| Ncor1           | TATGGACCGGGTAGACCGAG     | CGGTGTTTTTGTTCACAGGAG    |
| Tab3            | ATGGCGCAAACAGTCCACA      | TGTAACATGCACTGGGATACCA   |
| Sirt1           | TGATTGGCACCGATCCTCG      | CCACAGCGTCATATCATCCAG    |
| Grb10           | GTGGTGGAGATTCTAACCGACA   | ACCTCTCTAATCCCAGTTGTGG   |
| Map3k5          | CGTGCTGGACCGTTTTTACAA    | TGTCACCATGTAGGGGATGAAG   |
| Ucp3            | CTGCACCGCCAGATGAGTTT     | ATCATGGCTTGAAATCGGACC    |
| Pepck           | CTGCATAACGGTCTGGACTTC    | GCCTTCCACGAACTTCCTCAC    |
| G6Pase          | CTGTTTGGACAACGCCCGTAT    | AGGTGACAGGGAACTGCTTTA    |
| $\beta$ -Actin  | GGCTGTATTCCCCTCCATCG     | CCAGTTGGTAACAATGCCATGT   |
| Atg14*          | CGATCACAACGGAGACACCA     | CAGCACTGATGGTGTAGGCA     |
| $\beta$ -Actin* | CATGTACGTTGCTATCCAGGC    | CTCCTTAATGTCACGCACGAT    |
| miR199a-5p      | GGGCCAGTGTTTCAGACTA      | TGCGTGTCGTGGAGTC         |
| U6              | CTCGCTTCGGCAGCACA        | ACGCTTCACGAATTTGCGT      |

\*human targets.
